# Supplementary material for: Outcomes of COVID-19 Patients with Severe Hypoxemic Acute Respiratory Failure: Non-Invasive Ventilation vs. Straight Intubation—A Propensity Score-Matched Multicenter Cohort Study
Source: MDPI journal article supplement (doi:10.3390/jcm11206063), 2022-10-14
Supplement: s1 [file s1]

## **Supplemental Material**

**Outcomes of COVID-19 patients with severe hypoxemic acute respiratory failure: non-invasive ventilation vs. straight intubation. A propensity score-matched multicenter cohort study.**

### **INDEX**

|                                                                                                                             |                  |
|-----------------------------------------------------------------------------------------------------------------------------|------------------|
| <b>Supplemental Table S1: Characteristics of overall population</b>                                                         | <b>Pag 2-3</b>   |
| <b>Supplemental Table S2. Differences in baseline demographic and clinical characteristics of patients at ICU admission</b> | <b>Pag 4-5</b>   |
| <b>Supplemental Table S3. STROBE Statement—Checklist.</b>                                                                   | <b>Pag 6</b>     |
| <b>Members of COVID-19 VENETO ICU Network</b>                                                                               | <b>Pag 10-12</b> |

**Supplemental Table S1: Characteristics of overall population**

|                                                                      | Overall population,<br>n=572 |
|----------------------------------------------------------------------|------------------------------|
| <b><u>Demographic and clinical characteristics, median [IQR]</u></b> |                              |
| Age (years)                                                          | 68 [58 - 75]                 |
| Gender (male)                                                        | 415 (76.6)                   |
| BMI (kg/m <sup>2</sup> )                                             | 28 [25 - 31]                 |
| Charlson Comorbidity Index                                           | 4 [2-5]                      |
| SOFA score at ICU admission                                          | 5 [3-7]                      |
| Onset of symptoms (days)                                             | 9 [6 - 12]                   |
| <b><u>Respiratory parameters at ICU admission, median [IQR]</u></b>  |                              |
| Respiratory rate (breaths/min)                                       | 22 [18-30]                   |
| PaO <sub>2</sub> /FiO <sub>2</sub>                                   | 113.92 [77.88- 175.67]       |
| Presence of dyspnea, n (%)                                           | 258 (65.0)                   |
| <b><u>Treatments before ICU admission, n (%)</u></b>                 |                              |
| Length of hospitalization before ICU admission (days), median [IQR]  | 2[1-5]                       |
| Antibiotic therapy                                                   | 176 (32.5)                   |
| Corticosteroids                                                      | 178 (38.0)                   |
| <b><u>Chronic diseases, n(%)</u></b>                                 |                              |
| COPD                                                                 | 41 (7.6)                     |
| Previous myocardial infarction                                       | 56 (10.4)                    |
| Cognitive decline                                                    | 21 (3.9)                     |
| Complicated diabetes                                                 | 36 (6.3)                     |
| Peripheral vascular disease                                          | 45 (8.3)                     |
| Moderate to severe CKD                                               | 31 (5.8)                     |
| <b><u>Long-term medical treatments, n(%)</u></b>                     |                              |
| Ace inhibitors                                                       | 116 (21.6)                   |
| Angiotensin II receptor antagonists                                  | 71 (13.2)                    |

|                                                                  |                           |
|------------------------------------------------------------------|---------------------------|
| <i>Statins</i>                                                   | 106 (19.7)                |
| <i>Anticoagulants</i>                                            | 54 (9.4)                  |
| <b><u>Laboratory findings at ICU admission, median [IQR]</u></b> |                           |
| <i>WBCs (<math>\times 10^9/L</math>)</i>                         | 9[6.00-12.00]             |
| <i>PCT (ng/ml)</i>                                               | 0.30 [0.00- 1.00]         |
| <i>Ferritin (ng/ml)</i>                                          | 1422.00 [626.00- 2106.00] |
| <i>IL-6 (ug/L)</i>                                               | 87.00 [46.00- 194.00]     |
| <i>Fibrinogen (g/L)</i>                                          | 6.00 [5.00- 7.70]         |
| <i>PT (%)</i>                                                    | 75.00 [64.00- 93.00]      |

Data are presented as number (%) or median [interquartile range]

**Abbreviations:** BMI: body mass index; SOFA: sequential organ failure assessment; ICU: intensive care unit; PaO<sub>2</sub>/FiO<sub>2</sub>: ratio between partial pressure of arterial oxygen and fraction of inspired oxygen; *COPD*: chronic obstructive pulmonary disease; *CKD*: chronic kidney disease; *WBC*: white blood cells; *PCT*: procalcitonin; *IL*: interleukin; *PT*: prothrombin time; *ICU*: intensive care unit.

**Supplemental Table S2. Differences in baseline demographic and clinical characteristics of patients at ICU admission**

|                                                        | straight intubation<br>n=313 (58%) | NIV<br>n=229(42%)     | <i>p-value</i>   |
|--------------------------------------------------------|------------------------------------|-----------------------|------------------|
| <b><u>Demographic and clinical characteristics</u></b> |                                    |                       |                  |
| Age (years)                                            | 68 [58- 75]                        | 68 [58- 74]           | 0.83             |
| Gender (male)                                          | 244 (78.00)                        | 171 (74.70)           | 0.41             |
| BMI (kg/m <sup>2</sup> )                               | 28 [26- 31]                        | 28 [25- 31]           | 0.17             |
| Charlson Comorbidity Index                             | 4 [2-5]                            | 4 [3- 5]              | 0.13             |
| SOFA score at ICU admission                            | 5 [4- 8]                           | 4 [3- 6]              | <b>&lt;0.001</b> |
| Onset of symptoms (days)                               | 9 [6-13]                           | 9 [6- 12]             | 0.30             |
| <b><u>Respiratory parameters at ICU admission</u></b>  |                                    |                       |                  |
| Respiratory rate (breaths/min)                         | 22.00 [16.00- 30.00]               | 24.00 [20.00-30.00]   | 0.16             |
| PaO <sub>2</sub> /FiO <sub>2</sub>                     | 103.33 [75.78- 180.50]             | 118.33 [81.43-171.67] | 0.08             |
| Presence of dyspnea                                    | 142 (66.4)                         | 116 (63.4)            | 0.60             |
| <b><u>Treatments before ICU admission</u></b>          |                                    |                       |                  |
| Length of hospitalization before ICU admission (days)  | 2 [1- 5]                           | 2 [1- 5]              | 0.81             |
| Antibiotic therapy                                     | 99 (31.7)                          | 77 (33.6)             | 0.69             |
| Corticosteroids                                        | 94 (36.6)                          | 84 (39.6)             | 0.61             |
| <b><u>Chronic diseases, n(%)</u></b>                   |                                    |                       |                  |
| COPD                                                   | 22 (7.0)                           | 19 (8.3)              | 0.71             |
| Previous myocardial infarction                         | 31 (10.0)                          | 25 (10.9)             | 0.43             |
| Cognitive decline                                      | 8 (2.6)                            | 13 (5.7)              | 0.10             |
| Complicated diabetes                                   | 16 (5.1)                           | 20 (8.7)              | 0.13             |
| Peripheral vascular disease                            | 21 (6.8)                           | 24 (10.5)             | 0.11             |
| Moderate to severe CKD                                 | 17 (5.5)                           | 14 (6.1)              | 0.31             |
| <b><u>Long-term medical treatments n(%)</u></b>        |                                    |                       |                  |
| Ace inhibitors                                         | 71 (22.9)                          | 45 (19.8)             | 0.46             |
| Angiotensin II receptor antagonists                    | 39 (12.6)                          | 32 (14.1)             | 0.70             |
| Statins                                                | 63 (20.3)                          | 43 (18.9)             | 0.86             |
| Anticoagulants                                         | 23 (7.4)                           | 31 (13.5)             | 0.90             |

|                                                    |                          |                          |      |
|----------------------------------------------------|--------------------------|--------------------------|------|
| <b><u>Laboratory findings at ICU admission</u></b> |                          |                          |      |
| <b><i>WBCs (<math>\times 10^9/L</math>)</i></b>    | 9.00 [6.00- 12.00]       | 8.00 [6.00- 12.00]       | 0.30 |
| <b><i>PCT (ng/ml)</i></b>                          | 0.30 [0.00- 1.00]        | 0.20 [0.00- 1.00]        | 0.44 |
| <b><i>Ferritin (ng/ml)</i></b>                     | 1518.00 [705.00-2368.00] | 1300.50 [540.75-1992.75] | 0.28 |
| <b><i>IL-6 (ug/L)</i></b>                          | 111.00 [59.00-215.50]    | 80.00 [31.25- 163.75]    | 0.31 |
| <b><i>Fibrinogen (g/L)</i></b>                     | 6.09 [5.00- 7.97]        | 6.00 [4.80-7.00]         | 0.15 |
| <b><i>PT (%)</i></b>                               | 76.00 [64.00-103.00]     | 75.00 [65.75-93.00]      | 0.81 |

Data are presented as number (%) or median [interquartile range]

**Abbreviations:** BMI: body mass index; SOFA: sequential organ failure assessment; ICU: intensive care unit; PaO<sub>2</sub>/FiO<sub>2</sub>: ratio between partial pressure of arterial oxygen and fraction of inspired oxygen; COPD: chronic obstructive pulmonary disease; CKD: chronic kidney disease; WBC: white blood cells; PCT: procalcitonin; IL: interleukin; PT: prothrombin time; ICU: intensive care unit.

**Supplemental Table S3. STROBE Statement—Checklist.**

|                           | Item No | Recommendation                                                                                                                                                                       | Page No     |
|---------------------------|---------|--------------------------------------------------------------------------------------------------------------------------------------------------------------------------------------|-------------|
| Title and abstract        | 1       | (a) Indicate the study’s design with a commonly used term in the title or the abstract                                                                                               | 1-4         |
|                           |         | (b) Provide in the abstract an informative and balanced summary of what was done and what was found                                                                                  | 1-4         |
| Introduction              |         |                                                                                                                                                                                      |             |
| Background/rationale      | 2       | Explain the scientific background and rationale for the investigation being reported                                                                                                 | 5           |
| Objectives                | 3       | State specific objectives, including any prespecified hypotheses                                                                                                                     | 6           |
| Methods                   |         |                                                                                                                                                                                      |             |
| Study design              | 4       | Present key elements of study design early in the paper                                                                                                                              | 6           |
| Setting                   | 5       | Describe the setting, locations, and relevant dates, including periods of recruitment, exposure, follow-up, and data collection                                                      | 6           |
| Participants              | 6       | (a) Give the eligibility criteria, and the sources and methods of selection of participants. Describe methods of follow-up                                                           | 6, Figure 1 |
|                           |         | (b) For matched studies, give matching criteria and number of exposed and unexposed                                                                                                  | -           |
| Variables                 | 7       | Clearly define all outcomes, exposures, predictors, potential confounders, and effect modifiers. Give diagnostic criteria, if applicable                                             | 6,7         |
| Data sources/ measurement | 8*      | For each variable of interest, give sources of data and details of methods of assessment (measurement). Describe comparability of assessment methods if there is more than one group | -           |

|                        |     |                                                                                                                                                                                                   |             |
|------------------------|-----|---------------------------------------------------------------------------------------------------------------------------------------------------------------------------------------------------|-------------|
| Bias                   | 9   | Describe any efforts to address potential sources of bias                                                                                                                                         | -           |
| Study size             | 10  | Explain how the study size was arrived at                                                                                                                                                         | Figure 1    |
| Quantitative variables | 11  | Explain how quantitative variables were handled in the analyses. If applicable, describe which groupings were chosen and why                                                                      | 7           |
| Statistical methods    | 12  | (a) Describe all statistical methods, including those used to control for confounding                                                                                                             | 8           |
|                        |     | (b) Describe any methods used to examine subgroups and interactions                                                                                                                               | 8           |
|                        |     | (c) Explain how missing data were addressed                                                                                                                                                       | 8           |
|                        |     | (d) If applicable, explain how loss to follow-up was addressed                                                                                                                                    | 8           |
|                        |     | (e) Describe any sensitivity analyses                                                                                                                                                             | -           |
| <b>Results</b>         |     |                                                                                                                                                                                                   |             |
| Participants           | 13* | (a) Report numbers of individuals at each stage of study—eg numbers potentially eligible, examined for eligibility, confirmed eligible, included in the study, completing follow-up, and analyzed | 9, Figure 1 |
|                        |     | (b) Give reasons for non-participation at each stage                                                                                                                                              | Figure 1    |
|                        |     | (c) Consider use of a flow diagram                                                                                                                                                                | Figure 1    |
| Descriptive data       | 14* | (a) Give characteristics of study participants (eg demographic, clinical, social) and information on exposures and potential confounders                                                          | 9           |
|                        |     | (b) Indicate number of participants with missing data for each variable of interest                                                                                                               | -           |

|                   |     |                                                                                                                                                                                                                                                                                                                                                                                                                              |        |
|-------------------|-----|------------------------------------------------------------------------------------------------------------------------------------------------------------------------------------------------------------------------------------------------------------------------------------------------------------------------------------------------------------------------------------------------------------------------------|--------|
|                   |     | (c) Summarize follow-up time (eg, average and total amount)                                                                                                                                                                                                                                                                                                                                                                  | 9      |
| Outcome data      | 15* | Report numbers of outcome events or summary measures over time                                                                                                                                                                                                                                                                                                                                                               | 10     |
| Main results      | 16  | <p>(a) Give unadjusted estimates and, if applicable, confounder-adjusted estimates and their precision (eg, 95% confidence interval). Make clear which confounders were adjusted for and why they were included</p> <p>(b) Report category boundaries when continuous variables were categorized</p> <p>(c) If relevant, consider translating estimates of relative risk into absolute risk for a meaningful time period</p> | 10     |
| Other analyses    | 17  | Report other analyses done—eg analyses of subgroups and interactions, and sensitivity analyses                                                                                                                                                                                                                                                                                                                               | -      |
| <b>Discussion</b> |     |                                                                                                                                                                                                                                                                                                                                                                                                                              |        |
| Key results       | 18  | Summarize key results with reference to study objectives                                                                                                                                                                                                                                                                                                                                                                     | 11, 12 |
| Limitations       | 19  | <p>Discuss limitations of the study, taking into account sources of potential bias or imprecision.</p> <p>Discuss both direction and magnitude of any potential bias</p>                                                                                                                                                                                                                                                     | 12     |

|                          |    |                                                                                                                                                                            |    |
|--------------------------|----|----------------------------------------------------------------------------------------------------------------------------------------------------------------------------|----|
| Interpretation           | 20 | Give a cautious overall interpretation of results considering objectives, limitations, multiplicity of analyses, results from similar studies, and other relevant evidence | 12 |
| Generalisability         | 21 | Discuss the generalizability (external validity) of the study results                                                                                                      | 12 |
| <b>Other information</b> |    |                                                                                                                                                                            |    |
| Funding                  | 22 | Give the source of funding and the role of the funders for the present study and, if applicable, for the original study on which the present article is based              | 14 |

**Members of COVID-19 VENETO ICU Network:**

Silvia De Rosa<sup>1</sup>, Nicola Cacco<sup>2</sup>, Chiara Pretto<sup>2</sup>, Martina Tocco<sup>2</sup>, Enrico Tamburini<sup>2</sup>, Marina Munari<sup>2</sup>, Fabio Baratto<sup>3</sup>, Fabio Toffoletto<sup>4</sup>, Giulio Andreatta<sup>2</sup>, Leonardo Gandolfi<sup>2</sup>, Alessandra Gadaldi<sup>2</sup>, Nicolò Brumana<sup>2</sup>, Edoardo Forin<sup>2</sup>, Christelle Correale<sup>2</sup>, Elisa Pesenti<sup>2</sup>, Davide Fregolent<sup>2</sup>, Pier Francesco Pirelli<sup>2</sup>, Davide Marchesin<sup>2</sup>, Silvia Crociani<sup>2</sup>, Matteo Perona<sup>2</sup>, Nicola Franchetti<sup>2</sup>, Michele Della Paolera<sup>2</sup>, Caterina Simoni<sup>2</sup>, Gianlorenzo Golino<sup>2</sup>, Tatiana Falcioni<sup>2</sup>, Alessandra Tresin<sup>2</sup>, Chiara Schiavolin<sup>2</sup>, Aldo Schiavi<sup>2</sup>, Sonila Vathi<sup>2</sup>, Daria Sartori<sup>2</sup>, Alice Sorgato<sup>2</sup>, Federico Linassi<sup>2</sup>, Eugenio Serra<sup>2</sup>, Demetrio Pittarello<sup>2</sup>, Ivo Tiberio<sup>2</sup>, Ottavia Bond<sup>2</sup>, Elisa Michieletto<sup>2</sup>, Luisa Muraro<sup>2</sup>, Arianna Peralta<sup>2</sup>, Paolo Persona<sup>2</sup>, Enrico Petranzan<sup>2</sup>, Francesco Zarantonello<sup>2</sup>, Eleonora Piasentini<sup>2</sup>, Lorenzo Bernardi<sup>5</sup>, Roberto Pianon<sup>5</sup>, Flavio Badii<sup>6</sup>, Enrico Bosco<sup>7</sup>, Moreno Agostini<sup>8</sup>, Paride Trevisiol<sup>9</sup>, Antonio Farnia<sup>10</sup>, Mario Peta<sup>10</sup>, Mauro Antonio Calò<sup>11</sup>, Marco Meggiolaro<sup>12</sup>, Francesco Lazzari<sup>13</sup>, Ivan Martinello<sup>13</sup>, Giorgio Fullin<sup>13</sup>, Francesco Papaccio<sup>13</sup>, Alfeo Bonato<sup>14</sup>, Camilla Sgarabotto<sup>14</sup>, Francesco Montacciani<sup>3</sup>, Parnigotto Alessandra<sup>3</sup>, Giuseppe Gagliardi<sup>15</sup>, Gioconda Ferraro<sup>15</sup>, Luigi Ongaro<sup>16</sup>, Marco Baiocchi<sup>17</sup>, Vinicio Danzi<sup>1</sup>, Paolo Zanatta<sup>18</sup>, Simonetta Marchiotto<sup>19</sup>, Silvia Bassanini<sup>19</sup>, Massimo Zamperini<sup>20</sup>, Ivan Daroui<sup>20</sup>, Walter Mosaner<sup>21</sup>, Luigi Ongaro<sup>22</sup>, Lorella Altafini<sup>23</sup>, Ezio Sinigaglia<sup>24</sup>, Alessandra da Ros<sup>24</sup>

<sup>1</sup> U.O.C Anestesia e Rianimazione, Ospedale di Vicenza, Vicenza (VI), AULSS 8 Berica

<sup>2</sup> Azienda Ospedale-Università di Padova, Padova

<sup>3</sup> U.O.C. Anestesia e Rianimazione, Ospedali Riuniti Padova Sud, Monselice (PD), AULSS 6 Euganea

<sup>4</sup> U.O.C. Anestesia e Rianimazione, Ospedali di San Donà di Piave e Jesolo, San Donà di Piave (VE), AULSS 4 Veneto Orientale U.O.C.

<sup>5</sup> U.O.C. Anestesia e Rianimazione, Presidio Ospedaliero “San Martino”, Belluno (BL), AULSS 1 Dolomiti

- <sup>6</sup> U.O.C. Anestesia e Rianimazione, Ospedale di Vittorio Veneto, Vittorio Veneto (TV), AULSS 2 Marca Trevigian
- <sup>7</sup> U.O.C. Anestesia e Rianimazione, Ospedale di Conegliano, Conegliano (TV), AULSS 2 Marca Trevigiana
- <sup>8</sup> U.O.C. Anestesia e Rianimazione, Ospedale di Montebelluna, Montebelluna (TV), AULSS 2 Marca Trevigiana
- <sup>9</sup> U.O.C. Anestesia e Rianimazione, Ospedale di Oderzo, Oderzo (TV), AULSS 2 Marca Trevigiana
- <sup>10</sup> U.O.C. Anestesia e Rianimazione, Ospedale Ca' Foncello, Treviso, AULSS 2 Marca Trevigiana
- <sup>11</sup> U.O.C. Anestesia, Rianimazione e Terapia Antalgica, Presidio Ospedaliero di Mirano, Mirano (VE) AULSS 3 Serenissima
- <sup>12</sup> U.O.C. Anestesia e Rianimazione, Ospedale SS. Giovanni e Paolo, Venezia, AULSS 3 Serenissima
- <sup>13</sup> U.O.C. Anestesia e Rianimazione, Ospedale dell'Angelo, Mestre (VE), AULSS 3 Serenissima
- <sup>14</sup> U.O.C. Anestesia e Rianimazione, Ospedale di Cittadella, Cittadella (PD), AULSS 6 Euganea
- <sup>15</sup> U.O.C. Anestesia e Rianimazione, Ospedali di Rovigo e Trecenta, Rovigo, AULSS 5 Polesana
- <sup>16</sup> U.O.C. Anestesia e Rianimazione, Ospedale Alto Vicentino, Santorso (VI), AULSS 7 Pedemontana
- <sup>17</sup> U.O.C. Anestesia e Rianimazione, Ospedale San Bassiano, Bassano del Grappa (VI), AULSS 7 Pedemontana
- <sup>18</sup> U.O. Anestesia e Rianimazione A, Azienda Ospedaliera Universitaria Integrata Verona, Verona

<sup>19</sup> U.O.C Anestesia e Rianimazione, Ospedale Magalini di Villafranca, Legnago (VR), AULSS

9 Scaligera

<sup>20</sup> Dipartimento di Anestesia, Rianimazione e Terapia Antalgica, IRCCS Sacro Cuore-Don

Calabria, Negrar

<sup>21</sup> U.O. Terapia Intensiva, Ospedale P. Pederzoli – Casa di Cura Privata SpA, Peschiera sul

Garda (VR)

<sup>22</sup> U.O.C. Anestesia e Rianimazione, Ospedale Alto Vicentino, Santorso (VI), AULSS 7

Pedemontana

<sup>23</sup> U.O.C. Anestesia, Rianimazione e Terapia Antalgica, Presidio Ospedaliero di Dolo, Dolo

(VE), AULSS 3 Serenissima

<sup>24</sup> Anestesia e Rianimazione, Ospedale Mater Salutis di Legnago, Legnago (VR), AULSS 9

Scaligera
